# Supplementary material
Source: publisher site journal article supplement (https://www.dovepress.com/article/436622)
Supplement: Supplementary file 1 [file get_supplementary_file.php]

**Appendix 1**

**Part one**

**Socio-demographic and medical profile:**

- Age
- Gender
- Educational level

High school or less

Diploma or higher

Marital status

Married

Non-Married

- Income

<1000 JDs/month

≥ 1000 JDs/month

- Duration of asthma_________
- Have you been hospitalized for asthma in the last year?

Yes

No

- Are you a smoker?

Yes

Former smoker

No

- Are you exposed to passive smoking?

Yes

No

**Asthma Control Test (ACT):**

In the past 4 weeks have you had:

- Daytime asthma symptoms more than twice/week?

Yes

No

- Any night waking due to asthma?

Yes

No

- SABA reliver for asthma more than twice/week?

Yes

No

- Any activity limitation due to asthma?

Yes

No

**Part two**

**Knowledge about asthma**

|  | Yes | No | I don’t know |
| --- | --- | --- | --- |
| Asthma is an infectious disease |  |  |  |
| Asthma is a hereditary disease |  |  |  |
| Patients may experience flare ups/exacerbations |  |  |  |
| Asthma is a chronic disease |  |  |  |
| Do you know the spirometry test? |  |  |  |
| Do you know how to properly use the peak flow meter? |  |  |  |
| Does cold weather trigger asthma symptoms? |  |  |  |
| Does smoking trigger asthma symptoms? |  |  |  |
| Does exposure to pets trigger asthma symptoms? |  |  |  |
| Does perfume trigger asthma symptoms? |  |  |  |
| Do dust/air pollution trigger asthma symptoms? |  |  |  |
| Do pollens trigger asthma symptoms? |  |  |  |
| Does Allergic rhinitis make asthma symptoms worse? |  |  |  |
| Does Sinusitis make asthma symptoms worse? |  |  |  |
| Does Flu make asthma symptoms worse? |  |  |  |
| Does Tonsillitis make asthma symptoms worse? |  |  |  |
| Do you know how to correctly use asthma inhalers? |  |  |  |
| Do Aspirin worsen asthma symptoms? |  |  |  |
| Do NSAIDS (brofen, voltaren) worsen asthma symptoms? |  |  |  |

**Knowledge about Flu**

- Flu is the same as a common cold.

Yes

No

I don’t know

- Flu is caused by bacteria.

Yes

No

I don’t know

- Flu can spread from one person to another.

Yes

No

I don’t know

- Antibiotics can be used to treat flu

Yes

No

I don’t know

**Knowledge about Flu vaccine**

- Is there a vaccine against flu?

Yes

No

I don’t know

- Do you know the difference between trivalent and quadrivalent flu vaccines

Yes

No

I don’t know

- Does the vaccine have side effects?

Yes

No

I don’t know

- When is the appropriate time to take the flu vaccine?

(January-March)

(April-August)

(September- October)

(November- December)

I don’t know

**Part Three**

**Attitude towards Flu vaccine**

|  | Strongly agree | Agree | Neutral | Disagree | Strongly disagree |
| --- | --- | --- | --- | --- | --- |
| I believe that I must receive the influenza vaccination |  |  |  |  |  |
| It is easy to reach the pharmacy /hospital to receive the influenza vaccination |  |  |  |  |  |
| My physician believes that I should receive the influenza vaccine |  |  |  |  |  |
| Influenza vaccination prevents infection by the influenza virus |  |  |  |  |  |
| The influenza vaccination may cause complications/troubles for me |  |  |  |  |  |
| I believe that I get sick because of the influenza shot |  |  |  |  |  |
| I am worried about the chances of contracting the influenza because of the influenza vaccine |  |  |  |  |  |
| Catching the influenza is not a problem for me |  |  |  |  |  |

**Part Four**

**Practice regarding** **Asthma**

|  | Always | Most of the time | Sometimes | Rarely | Never |
| --- | --- | --- | --- | --- | --- |
| How often do you avoid smoking/exposure to smoking? |  |  |  |  |  |
| How often do you avoid exposure to pets? |  |  |  |  |  |
| How often do you avoid exposure to cold weather? |  |  |  |  |  |
| How often do you avoid exposure to perfumes? |  |  |  |  |  |
| How often do you avoid exposure to dust/air pollution? |  |  |  |  |  |
| How often do you change your beddings weekly? |  |  |  |  |  |
| How often do you avoid taking aspirin or NSAIDs? |  |  |  |  |  |
| Do you perform a spirometry test on every visit to the physician? |  |  |  |  |  |
| Do you perform a spirometry test each time your physician recommends doing so? |  |  |  |  |  |
| How often do you use a flow meter at home? |  |  |  |  |  |
| How often do you use an air dehumidifier? |  |  |  |  |  |

**Practice regarding** **Flu**

- How often did you get vaccinated against flu?

Once

More than once

Annually

Never

***If previously vaccinated, the respondents will be directed to previous experience about flu vaccine otherwise, the participants will be directed to skip this section to the future vaccination intension question.***

- What type of vaccine did you receive?

Trivalent

Quadrivalent

I don’t know

- Did you feel any of the following side effects after receiving the vaccine? [you can choose more than one answer]

Fever

Redness

Fatigue

Headache

Nausea

- What was the severity of the side effects?

Severe

Moderate

Mild

- Do you intend to get the flu vaccine this year?

Yes

No

Not sure

***If the respondents answered no or not sure to the previous question, they will be directed to reasons behind vaccination hesitancy otherwise, the participants will be directed to submit the questionnaire***

- What are the reasons for you not wanting to be vaccinated? [you can choose more than one answer]
- It is expensive.
- I do not believe it is effective.
- I forgot it.
- I think it may be harmful.
- The physicians do not recommend it.
- I don’t know about its benefits.
- I got the flu even though I had been previously vaccinated.
